# Supplementary material for: A tunable affinity fusion tag for protein self-assembly
Source: PubMed Central journal article supplement (PMC11761134; doi:10.1101/2025.01.14.633037), 2025-01-15

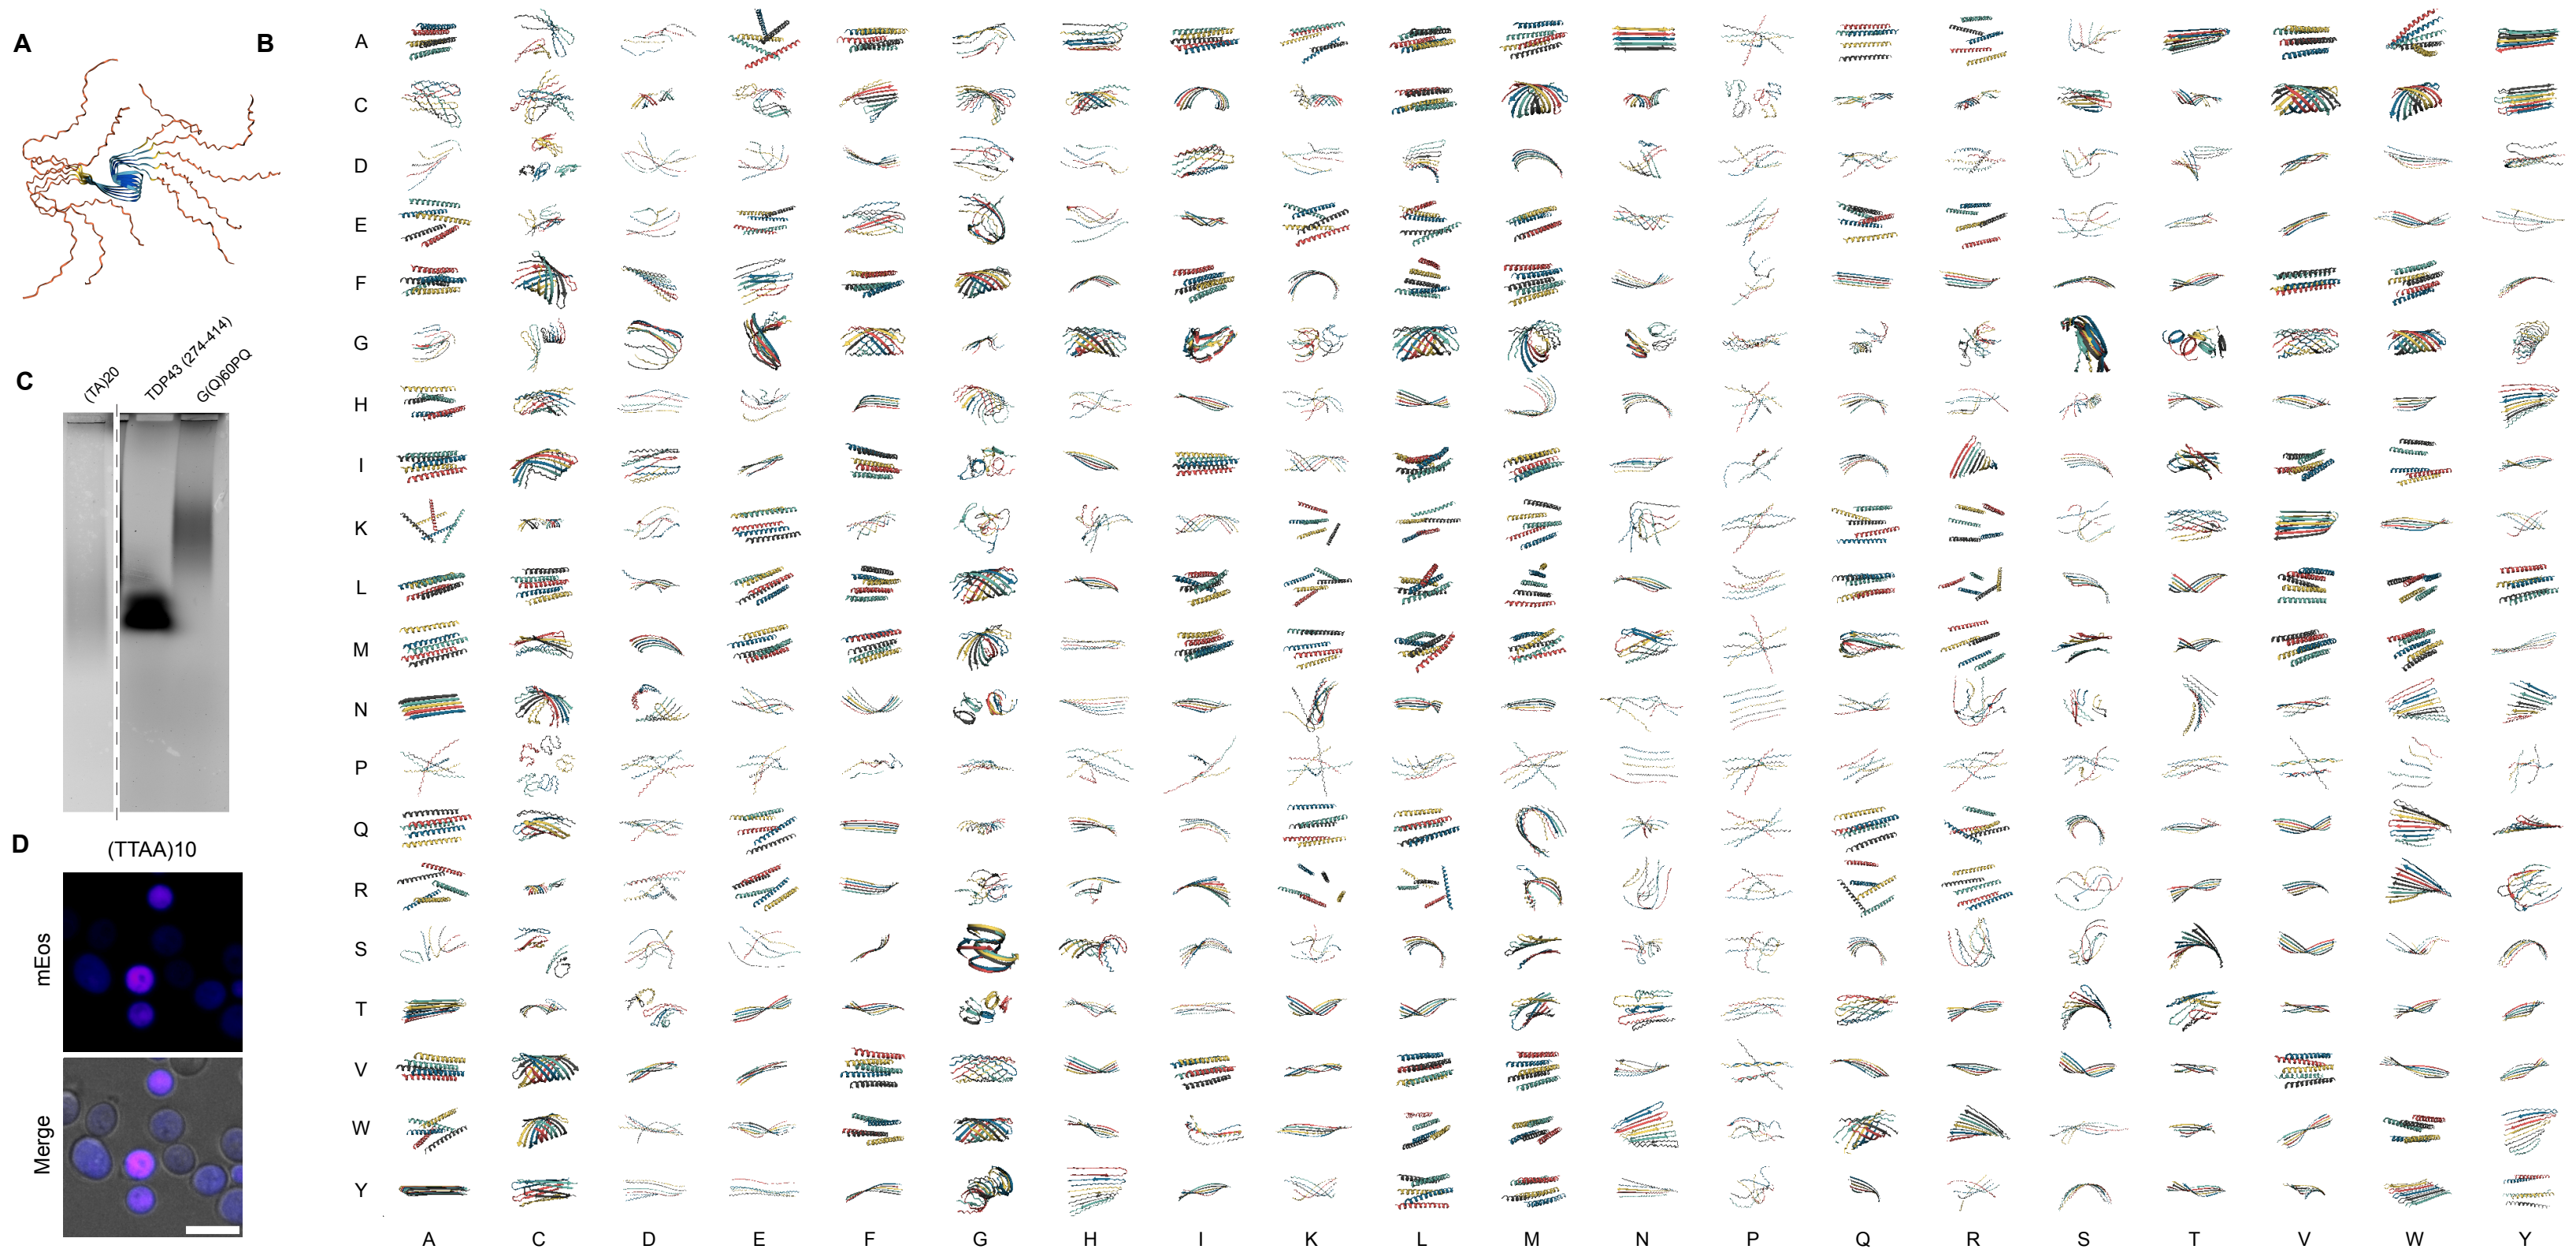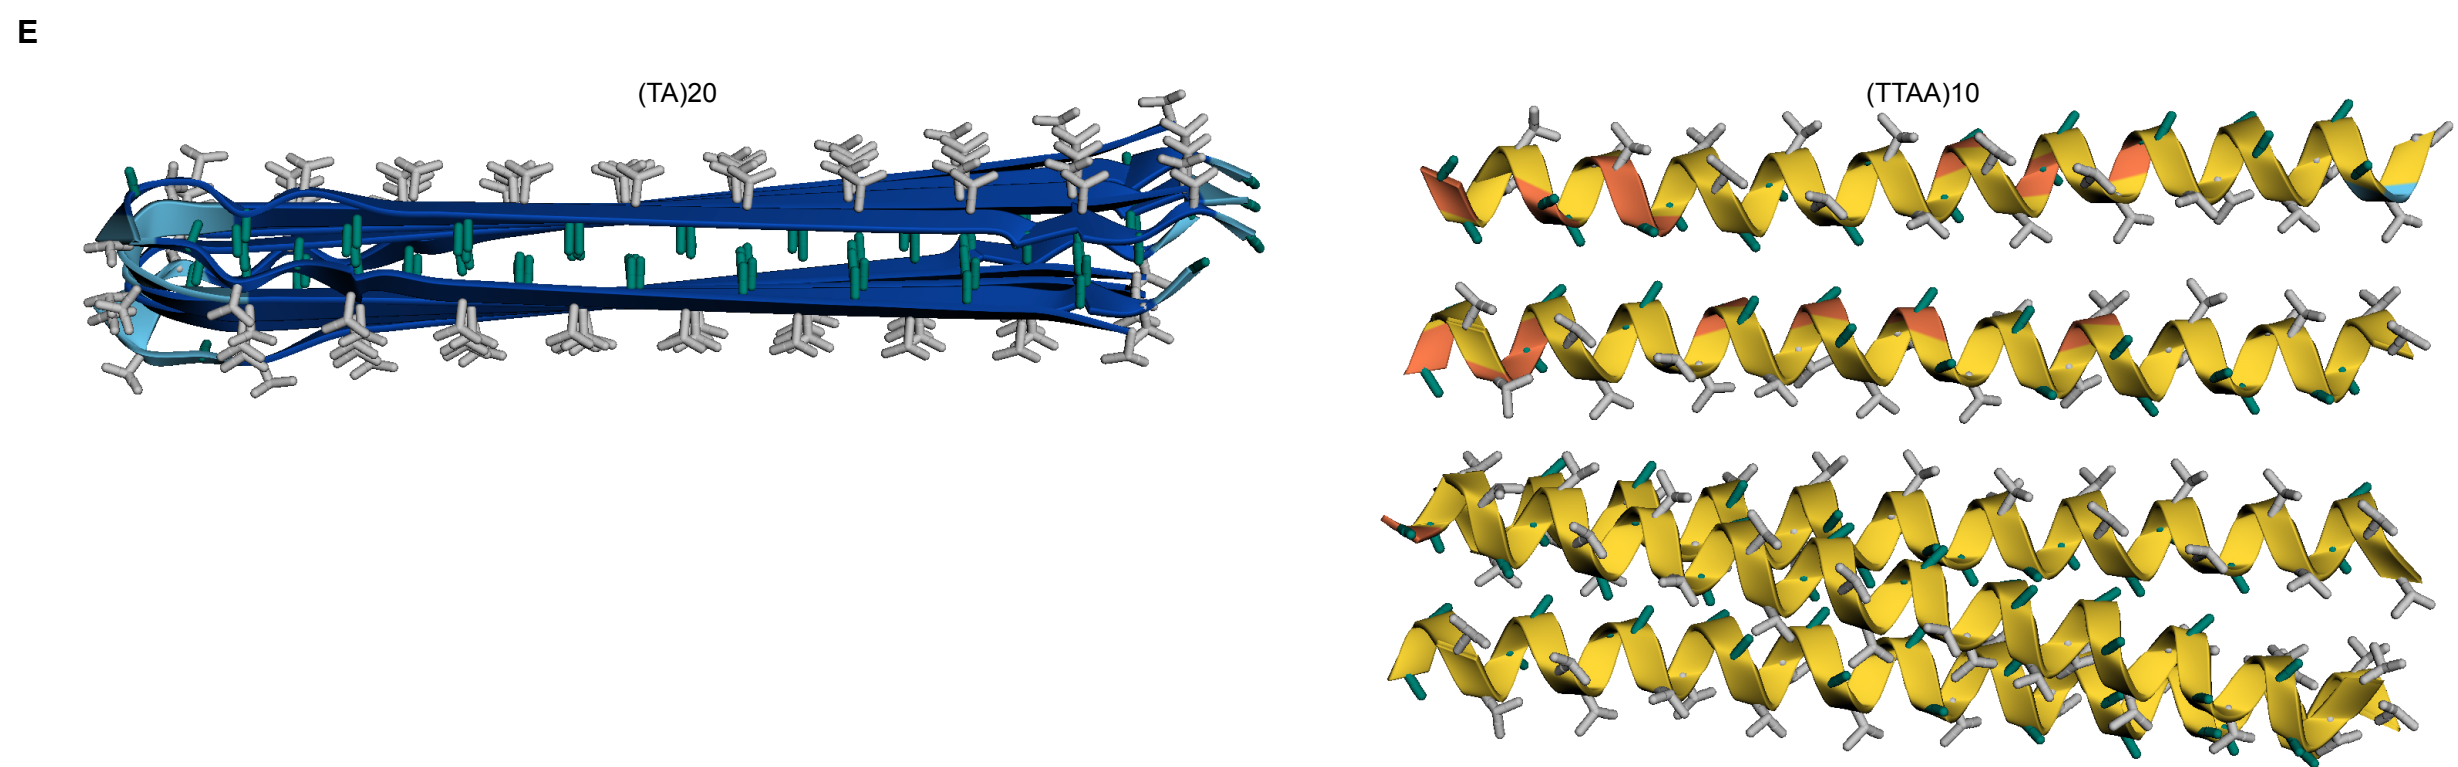

Supplement: media-1.pdf [file media-1.pdf]
